# Supplementary material
Source: publisher figshare collection journal article supplement (https://gsapubs.figshare.com/articles/dataset/_/12533900)
Supplement: Supplementary file 1 [file 1]

## Sheet: Combined Data
Supplementary Table DR2: Combined Zircon Data
			U-Th								U-Pb										Trace Elements (ppm)
Dome	Sample	Core/Rim	(238U/232Th)	1σ	(230Th/232Th)	1σ	(230Th)/(238U) age (ka)	1σ+	1σ-	U ppm	238U/206Pb	1σ	207Pb*/206Pb*	1σ	Correlation of TW elipses	206Pb/238U age (Ma)	±1σ (Ma)	U ppm	UO/U	% 206Pb*	Mg	P	Ti	Mn	57Fe+/30Si+	Y	La	Ce	Pr	Nd	Sm	Eu	Gd	Tb	Dy	Ho	Er	Tm	Yb	Lu	Hf	Th	U	Th/U	Ce/Yb	Eu/Eu*	Zr/Hf
Chanka	1_1	Rim	6.10	0.10	6.15	0.14	¥	¥	¥	571	9900	459	0.227	0.029	-0.0662	0.585	0.039	994	8.26	76.9	1.41	146	4.75	0.443	0.000513	951	0.0433	51.5	0.0679	1.01	2.11	0.499	11.4	4.75	62.3	27.2	141	35.5	345	90.3	12900	712	1360	1.90	0.149	0.312	38.5
		Core									656	25	0.794	0.043	0.288	0.516	0.629	254	8.36	4.47	9.44	180	19.6	3.53	0.000621	612	0.477	20.5	0.120	1.25	2.17	0.383	10.3	3.81	45.3	18.6	87.6	20.7	192	49.2	11300	158	328	2.07	0.107	0.249	43.9
	1_2		6.21	0.12	5.96	0.16	338	164	-63	600
	1_3		3.82	0.05	3.57	0.07	274	44	-31	969
	1_4		4.18	0.06	4.01	0.09	329	101	-52	614
	1_5	Rim	5.68	0.19	5.69	0.19	¥	¥	¥	879	9340	427	0.216	0.031	0.355	0.623	0.040	897	8.34	78.3	38.8	182	141	29.3	0.00142	572	5.65	28.3	1.00	3.44	1.97	0.808	9.01	3.49	42.5	17.6	83.5	19.5	174	42.4	7290	233	368	1.58	0.163	0.588	68.3
		Core									8670	302	0.135	0.017	-0.0807	0.746	0.030	2040	8.33	88.6	4.14	216	5.73	0.920	0.000523	984	0.0907	38.6	0.0512	0.963	2.16	0.310	11.8	5.34	67.4	28.9	147	34.7	325	78.8	13400	342	1080	3.16	0.119	0.189	37.1
	1_6	Rim	4.55	0.11	4.58	0.13	¥	¥	¥	579	12800	612	0.230	0.028	-0.0260	0.462	0.030	1430	8.38	76.4	0.272	185	5.31	0.253	0.000511	1030	0.0610	47.7	0.0715	1.32	2.46	0.718	14.2	5.65	72.5	31.6	151	37.1	345	86.1	12200	557	1000	1.80	0.139	0.373	40.8
		Core									2870	244	0.576	0.018	-0.0882	0.807	0.247	3000	8.30	32.3	17.3	499	21.2	6.77	0.000869	2040	0.992	71.0	0.353	3.37	5.83	1.52	31.1	12.6	151	62.9	290	67.7	617	150	10300	1150	1590	1.38	0.115	0.347	48.5
	1_7		4.75	0.06	3.87	0.11	165	15	-13	497
	1_8	Rim	5.39	0.08	5.30	0.13	442	¥	-115	467	29800	2180	0.385	0.047	-0.0348	0.204	0.021	1640	8.39	56.7	0.497	259	4.62	0.641	0.000515	1440	0.733	65.3	0.302	2.24	3.22	0.869	18.0	7.54	94.7	42.6	213	53.0	507	131	12200	988	1700	1.72	0.129	0.350	40.7
		Core									17000	990	0.323	0.047	-0.292	0.326	0.034	1360	8.40	64.6	0.601	266	4.38	0.861	0.000481	1600	0.668	46.6	0.386	4.06	5.83	1.34	26.0	10.2	118	48.7	227	53.4	495	122	12000	762	1150	1.51	0.0942	0.333	41.4
	1_9		4.22	0.05	3.35	0.08	153	12	-11	1040
	1_10		4.26	0.05	3.88	0.09	244	32	-25	673
	1_11		4.22	0.05	3.09	0.07	124	8	-7	747
	1_12		5.95	0.07	3.35	0.07	76.1	3.4	-3.3	1600
	1_13		4.87	0.06	4.65	0.11	323	93	-50	525
	1_14		5.10	0.12	4.57	0.13	230	39	-29	834
	1_15		4.80	0.07	4.07	0.12	189	22	-18	493
	1_16		6.76	0.11	6.23	0.15	266	44	-31	600
	1_17
	1_18		4.81	0.11	3.02	0.08	90.1	6.2	-5.9	855
	1_19		4.26	0.05	3.97	0.09	272	46	-32	623
	1_20		6.15	0.13	3.61	0.07	83.1	4.4	-4.2	1490
	1_21		6.37	0.10	3.98	0.10	93.7	5.5	-5.3	1540
	1_22	Rim	3.84	0.05	3.81	0.07	510	¥	-155	730	6540	329	0.451	0.034	-0.261	0.564	0.075	837	8.46	48.3	0.346	147	5.07	0.280	0.000569	675	0.0629	27.2	0.0453	0.906	1.65	0.374	8.09	3.62	45.4	19.6	100	24.9	245	63.0	12100	276	608	2.21	0.111	0.313	41.1
		Core									9870	511	0.203	0.036	0.0830	0.608	0.044	965	8.13	79.9	0.199	230	4.07	0.274	0.000526	1000	0.0686	42.6	0.0571	0.867	1.90	0.356	11.8	5.07	67.6	30.3	150	36.3	339	83.6	13600	439	1120	2.55	0.126	0.231	36.6
	1_23		4.28	0.05	4.02	0.08	288	50	-34	658
	2_1	Rim	8.21	0.12	8.32	0.29	¥	¥	¥	238	13300	627	0.249	0.029	-0.133	0.440	0.030	1460	8.37	74.0	0.211	166	4.18	0.272	0.000523	851	0.0611	44.0	0.0386	1.10	2.12	0.562	11.1	4.82	58.2	25.3	124	29.4	283	71.5	12800	664	1130	1.71	0.155	0.355	38.8
		Core									10100	370	0.158	0.022	-0.413	0.619	0.030	1600	8.31	85.7	0.205	173	6.40	0.284	0.000564	721	0.0317	30.1	0.0611	0.957	1.79	0.491	9.94	3.95	50.8	21.6	103	26.1	240	61.8	11700	384	669	1.74	0.125	0.356	42.5
	2_2	Rim	4.85	0.10	4.77	0.14	435	¥	-128	366	13000	765	0.381	0.059	-0.0773	0.374	0.048	771	8.16	57.1	0.237	174	4.67	0.267	0.000502	990	0.0442	36.5	0.0545	0.985	2.10	0.558	12.1	5.24	64.3	29.1	146	36.5	358	92.2	11900	372	808	2.17	0.102	0.340	41.9
		Core									11500	492	0.157	0.027	-0.311	0.554	0.031	1760	8.60	85.8	0.239	167	3.97	0.259	0.000579	1850	0.0493	48.4	0.204	3.70	7.57	1.63	33.3	12.9	143	56.1	255	58.1	526	124	12100	783	1080	1.38	0.0920	0.315	41.1
	2_3		4.91	0.07	4.70	0.12	330	125	-57	467											6.60	1820	4.52	11.4	0.000548	1410	18.0	76.8	3.65	15.3	7.18	1.52	26.4	9.81	111	45.1	208	47.9	444	107	12900	607	906	1.49	0.173	0.338	38.5
	2_4	Rim	4.66	0.06	4.74	0.12	¥	¥	¥	512	11800	718	0.271	0.037	-0.00361	0.476	0.043	739	8.14	71.2	0.291	147	4.44	0.260	0.000540	644	0.0341	31.3	0.0497	0.813	1.76	0.432	8.78	3.54	43.4	19.3	94.2	23.7	224	57.7	12400	395	779	1.97	0.140	0.337	40.0
		Core									5710	209	0.209	0.024	-0.387	0.980	0.056	1320	8.34	79.2	9.04	1500	11.2	8.73	0.000583	1990	13.0	67.1	3.54	19.1	11.2	1.27	42.4	15.4	168	64.5	279	60.3	507	114	11600	306	391	1.28	0.133	0.179	43.0
	2_5	Rim	5.01	0.12	4.66	0.17	274	94	-50	456	7560	529	0.646	0.106	0.874	0.295	0.100	367	8.01	23.3
		Core									10600	454	0.128	0.029	-0.260	0.613	0.034	1490	8.35	89.5	0.304	246	8.78	0.305	0.000523	1580	0.101	56.2	0.274	4.50	6.54	1.45	28.5	10.3	118	47.9	217	50.2	453	109	11000	1150	1330	1.15	0.124	0.326	45.3
	2_6		4.20	0.06	3.91	0.09	270	48	-33	646											0.0789	150	3.69	0.256	0.000509	1930	0.0610	55.1	0.260	3.75	7.31	1.81	33.8	13.2	151	61.9	286	67.9	628	150	12500	1050	1460	1.39	0.0878	0.352	39.8
	2_7		4.12	0.04	4.18	0.08	¥	¥	¥	848
	2_8		4.58	0.05	4.04	0.09	214	23	-19	624
	2_9		4.28	0.07	3.77	0.09	212	26	-21	588
	2_10		6.37	0.10	5.83	0.14	256	40	-29	595
	2_11
	2b_1	Rim	5.20	0.12	5.18	0.17	616	¥	-289	291	9030	584	0.344	0.051	0.393	0.531	0.061	890	8.00	61.9
		Core																			0.279	193	6.82	0.281	0.000576	1620	0.0690	34.0	0.274	4.43	6.36	1.75	29.5	11.1	125	50.0	228	52.9	463	113	11100	510	668	1.31	0.0735	0.390	44.9
	2b_2		4.16	0.05	4.04	0.07	367	131	-58	844
	2b_4		4.09	0.10	3.12	0.08	136	13	-11	933											0.898	115	3.33	0.326	0.000573	1290	0.128	44.5	0.193	11.2	4.24	1.08	19.7	7.60	90.9	36.9	173	41.4	398	97.1	12300	584	930	1.59	0.112	0.364	40.3
	2b_5		5.11	0.07	3.42	0.07	104	5	-5	834											0.0997	205	3.02	0.270	0.000610	1290	0.0931	41.1	0.193	7.17	3.78	1.26	19.3	7.52	88.2	36.5	172	41.1	425	102	10900	616	1170	1.89	0.0969	0.451	45.8
	2b_6		6.29	0.07	6.49	0.17	¥	¥	¥	359											3.58	2380	3.26	14.6	0.000668	1390	16.9	78.0	4.07	20.5	7.41	1.42	24.4	8.86	103	41.4	196	46.2	441	106	11800	649	1020	1.57	0.177	0.323	42.3
	2b_7		4.66	0.08	4.49	0.11	349	194	-66	673											0.236	144	3.43	0.269	0.000573	935	0.0632	32.5	0.104	1.48	2.48	0.582	12.7	5.24	62.6	27.3	136	33.2	334	86.7	12700	421	866	2.06	0.0973	0.319	39.2
	2b_8		4.30	0.08	3.76	0.08	207	23	-19	642											0.0540	133	3.93	0.269	0.000549	1500	0.0414	41.1	0.134	2.83	5.08	1.32	23.9	9.12	111	45.8	214	51.4	484	118	12300	664	1010	1.52	0.0848	0.367	40.6
	2b_9		6.64	0.13	6.29	0.14	309	82	-46	468											0.815	179	3.22	0.302	0.000552	849	0.0627	30.2	0.0574	0.968	2.05	0.578	11.1	4.55	58.4	26.0	134	33.6	340	89.7	13000	443	1000	2.26	0.0889	0.370	38.3
	2b_11	Rim	4.97	0.10	4.94	0.13	538	¥	-204	489	12600	1220	0.345	0.034	-0.118	0.408	0.059	769	8.03	61.8
		Core																			0.251	224	5.67	0.220	0.000600	1700	0.0580	89.7	0.118	2.13	4.33	0.761	22.8	9.50	115	50.3	246	60.0	559	140	12600	1150	2250	1.95	0.160	0.235	39.5
	2b_12		5.38	0.09	3.18	0.05	82.0	3.5	-3.4	1900											0.0885	109	3.16	0.285	0.000489	1320	0.0508	45.7	0.115	2.17	3.97	1.12	21.5	8.40	97.9	40.2	192	45.6	437	108	13200	657	1140	1.73	0.105	0.371	37.7
	2b_13		4.47	0.05	3.93	0.09	211	22	-18	640											0.0264	131	3.28	0.240	0.000537	1660	0.0511	46.9	0.141	3.13	5.84	1.49	27.1	10.2	122	50.2	233	55.2	527	126	12400	818	1230	1.50	0.0889	0.363	40.2
	2b_14		6.17	0.10	5.12	0.11	181	15	-13	600											0.232	240	3.52	0.235	0.000561	897	0.106	29.0	0.0676	1.16	2.21	0.588	11.6	4.99	62.2	28.1	141	35.2	352	90.0	12600	377	838	2.22	0.0825	0.356	39.4
	2b_15		4.69	0.06	4.54	0.09	361	152	-61	555
Chao	1_1	Rim	5.93	0.12	5.36	0.16	236	45	-32	621	8890	374	0.154	0.014	0.0860	0.715	0.033	1140	8.09	86.2
		Core									5830	274	0.129	0.018	-0.0474	1.07	0.06	492	8.32	89.4
	1_2		5.21	0.10	5.24	0.17	¥	¥	¥	539
	1_3		4.81	0.14	4.38	0.14	238	60	-39	531
	1_4		5.87	0.19	3.57	0.15	82.1	9.1	-8.4	822
	1_5		4.52	0.11	4.13	0.12	239	55	-36	1540
	1_6	Rim	5.48	0.11	5.09	0.14	267	63	-40	881	24300	2070	0.230	0.035	0.0431	0.290	0.026	916	8.22	76.5
		Core									9160	682	0.276	0.033	-0.369	0.583	0.066	743	8.01	70.7
	1_7		7.21	0.32	5.28	0.16	128	17	-14	687
	1_8	Rim	5.49	0.13	5.77	0.21	¥	¥	¥	889	6300	362	0.124	0.020	0.0974	1.01	0.06	299	8.27	90.0
		Core									5216.48	228.85	0.09474	0.0137	-0.0769006	1.25806	0.0584288	832.324	7.934	93.7784
	1_9		8.85	0.41	5.48	0.36	92.2	14.9	-13.1	502
	1_10		9.11	0.47	7.63	0.34	186	47	-33	1200
	1_12	Rim	5.78	0.10	5.52	0.25	317	¥	-77	941	8030	403	0.126	0.028	0.0185	0.812	0.049	607	8.11	89.8
		Core									294	11	0.773	0.007	0.0145	1.64	1.08	1720	7.92	7.12
	1_13	Rim	3.62	0.07	3.58	0.14	448	¥	-166	684	4660	226	0.0897	0.0098	-0.176	1.40	0.07	833	8.21	94.4
		Core									4440	201	0.0791	0.0086	0.273	1.47	0.07	828	8.05	95.8
	1_15	Rim	7.77	0.25	6.22	0.19	161	21	-18	2180
		Core
	2_1		4.40	0.05	4.06	0.10	253	44	-32	805
	2_2		10.8	0.2	6.67	0.25	94.6	7.6	-7.1	635
	2_3		6.14	0.17	5.34	0.21	202	41	-30	1990
	2_4	Rim	3.43	0.06	3.28	0.12	307	265	-71	818	6860	298	0.127	0.012	0.0358	0.934	0.044	928	7.78	89.7
		Core									4200	204	0.155	0.010	-0.103	1.40	0.08	1100	7.80	86.1
	2_5		9.55	0.33	6.95	0.21	130	14	-12	1360
	2_6		4.79	0.12	4.26	0.09	215	33	-25	1620
	2_7	Rim	5.17	0.10	5.01	0.14	356	¥	-77	1710	8210	401	0.285	0.028	0.283	0.632	0.046	644	8.09	69.4
		Core									8740	400	0.113	0.014	-0.0273	0.759	0.036	766	7.91	91.5
	2_8		7.98	0.23	4.87	0.31	88.3	12.4	-11.2	499
	2_9	Rim	4.52	0.07	4.48	0.18	480	¥	-185	997	3470	180	0.367	0.031	0.295	1.18	0.12	466	7.50	58.9
	2_10	Rim	4.71	0.07	4.50	0.09	317	89	-48	1090	3770	146	0.435	0.022	-0.0578	0.948	0.090	715	8.33	50.2
		Core									5950	234	0.210	0.016	-0.0683	0.944	0.049	847	8.17	79.1
	2_11		5.24	0.25	4.32	0.12	168	31	-24	3530
	2_12		4.67	0.07	4.17	0.08	218	24	-20	2180
	2_13		5.05	0.11	4.14	0.09	163	17	-15	1070
	2_15	Rim	5.81	0.12	5.79	0.23	629	¥	-316	987	6490	322	0.188	0.019	-0.113	0.903	0.056	674	8.24	81.8
		Core									3010	369	0.287	0.054	-0.530	1.54	0.35	896	8.01	69.1
	2b_1		5.11	0.07	4.58	0.10	231	27	-22	520
	3_1		7.43	0.19	5.11	0.11	116	8	-8	2730											0.0934	126	2.68	0.265	0.000577	2050	0.0715	66.2	0.207	3.71	5.97	1.37	29.9	11.3	137	59.2	295	75.2	772	194	14500	1140	2930	2.58	0.0859	0.313	34.4
	3_2		4.20	0.05	3.70	0.07	212	19	-16	828											0.303	111	4.44	0.287	0.000500	873	0.127	29.5	0.0983	1.59	2.93	0.742	14.3	5.48	63.4	25.8	125	29.6	291	72.1	13000	383	655	1.71	0.101	0.351	38.3
	3_3		8.02	0.32	6.72	0.43	189	54	-36	968											0.477	179	2.98	0.391	0.000562	1280	1.03	45.3	0.479	4.70	4.22	0.840	19.0	7.20	88.2	37.8	191	48.6	496	129	13800	852	2030	2.38	0.0912	0.287	36.0
	3_4		4.71	0.09	4.20	0.13	224	37	-27	468											0.132	117	3.97	0.306	0.000504	713	0.142	26.9	0.0945	1.62	2.19	0.554	10.7	4.24	51.2	21.6	105	25.3	251	62.6	13700	265	561	2.12	0.108	0.352	36.2
	3_5		8.14	0.19	6.28	0.13	151	12	-11	2730											0.542	684	11.8	0.291	0.000492	5790	0.0821	14.6	0.298	5.59	13.6	4.07	86.8	37.6	466	190	851	188	1590	337	9930	199	281	1.41	0.00919	0.363	50.1
	3_6		4.96	0.07	2.94	0.12	81.0	7.0	-6.6	219											16.0	7250	6.64	36.2	0.000683	518	43.2	102	10.3	41.8	8.22	1.91	15.1	3.85	40.2	15.5	70.9	16.5	172	43.1	9490	132	243	1.84	0.593	0.524	52.5
	3_7		4.49	0.05	3.95	0.10	212	24	-19	634											0.204	140	4.21	0.283	0.000551	1150	0.0644	29.6	0.136	3.00	4.89	1.21	20.8	7.58	84.4	34.3	161	37.7	372	92.1	12800	479	778	1.63	0.0798	0.368	39.0
	3_8		7.40	0.20	6.30	0.20	197	29	-23	360											33.7	12600	10.9	68.8	0.00106	726	96.9	226	24.3	97.3	18.6	3.05	25.7	5.82	61.5	22.9	102	24.6	233	59.0	12800	236	465	1.97	0.968	0.427	38.8
	3_9		7.18	0.17	4.79	0.17	109	10	-9	1330											0.308	201	3.09	0.321	0.000574	1540	0.272	51.2	0.161	2.27	4.19	0.788	20.9	8.57	101	44.2	218	55.2	560	139	14100	964	2390	2.47	0.0915	0.258	35.2
	3_10		8.05	0.19	7.10	0.22	223	37	-28	990											0.135	311	3.45	0.259	0.000492	939	0.0868	31.8	0.0679	0.772	1.80	0.533	11.5	4.78	61.5	27.1	137	34.2	351	91.1	12800	405	1010	2.50	0.0905	0.360	38.8
	3_12		5.24	0.07	4.77	0.11	247	33	-25	462											0.0860	170	3.39	0.273	0.000516	1070	0.0395	32.3	0.0623	1.12	2.84	0.457	15.9	6.47	77.8	33.3	159	37.3	356	85.6	15000	407	885	2.18	0.0906	0.208	33.2
	3_11																				1.54	235	5.32	0.500	0.000587	1230	0.0757	38.5	0.0857	1.68	3.76	0.636	17.8	7.65	89.7	37.6	174	41.3	378	90.7	12600	428	805	1.88	0.102	0.238	39.4
	3_13		5.13	0.12	5.01	0.13	395	¥	-100	298											0.0949	108	4.22	0.310	0.000548	587	0.0476	17.1	0.0471	0.735	1.65	0.368	8.43	3.33	42.5	17.1	81.8	20.1	195	49.1	12800	180	407	2.26	0.0875	0.303	39.0
	3_13b	Rim									28700	2430	0.549	0.077	0.255	0.169	0.028	1530	7.95	35.7	0.274	196	5.20	0.230	0.000554	1090	0.0565	45.6	0.0863	1.25	2.41	0.487	13.9	5.77	75.0	32.7	161	39.4	373	96.1	12400	478	1020	2.13	0.122	0.258	40.2
		Core									16000	1020	0.518	0.088	0.271	0.250	0.048	715	8.42	39.7	0.326	193	5.11	0.248	0.000564	996	0.0673	28.1	0.137	2.03	3.87	0.868	15.8	5.87	69.8	29.0	138	33.6	325	82.7	11600	370	740	2.00	0.0867	0.340	42.8
	3_14		5.72	0.21	4.99	0.18	210	47	-33	922											0.144	122	3.12	0.279	0.000582	1380	0.0764	38.1	0.186	2.84	4.29	1.11	21.2	8.21	95.3	39.6	193	46.4	449	114	13000	607	1110	1.82	0.0847	0.356	38.4
	3_15		7.18	0.27	4.66	0.24	103	13	-12	2550											0.252	260	3.02	0.259	0.000553	1040	0.0537	38.6	0.0515	0.700	1.85	0.502	11.8	5.10	67.3	30.9	157	40.1	400	104	14700	520	1520	2.92	0.0965	0.328	33.9
	3_16		5.55	0.10	5.26	0.13	306	83	-47	655
	3_17		4.75	0.08	4.28	0.12	236	41	-30	501											0.841	127	5.97	0.296	0.000476	946	0.0845	25.8	0.126	1.90	3.34	0.834	16.1	6.23	72.7	28.8	129	32.3	308	77.6	12800	377	615	1.63	0.0837	0.348	38.8
	3_18		4.51	0.06	4.02	0.07	224	23	-19	621											0.0585	125	4.23	0.229	0.000557	1040	0.0493	28.8	0.106	2.04	3.85	0.842	17.2	6.47	75.5	30.9	147	35.0	342	86.7	13500	465	790	1.70	0.0841	0.317	36.9
	3_19		9.30	0.17	6.15	0.07	109	5	-4	2550											0.0859	131	2.24	0.248	0.000453	2780	0.0664	55.8	0.208	3.30	6.49	1.39	35.0	14.2	178	77.1	395	99.5	1040	269	15800	1230	4580	3.72	0.0538	0.282	31.5
	3_20		14.5	1.1	9.78	0.85	117	30	-23	406
	3_21		4.37	0.07	2.97	0.06	105	6	-6	1400											0.128	144	3.29	0.318	0.000597	3010	0.136	115	0.633	13.6	13.5	3.44	58.1	20.4	224	86.9	391	90.1	832	193	11300	2040	2970	1.46	0.139	0.376	43.9
	3_22		8.20	0.16	6.44	0.09	158	10	-9	1330											0.225	82.4	2.93	0.258	0.000584	1050	0.0983	33.8	0.126	7.77	2.44	0.878	11.8	4.76	60.8	27.9	147	39.7	446	118	12500	575	1790	3.11	0.0759	0.501	39.9
	3_23		4.54	0.07	4.25	0.13	284	75	-44	257											0.129	241	7.23	0.241	0.000547	866	0.0898	24.2	0.0577	1.67	2.61	0.446	14.1	5.32	66.0	26.6	120	27.1	241	56.6	11600	180	348	1.94	0.100	0.225	43.1
	3_24		5.46	0.11	4.68	0.07	198	18	-15	1440											0.145	186	5.31	0.279	0.000547	1580	0.0669	39.8	0.245	4.34	6.87	1.39	28.4	10.8	124	47.0	218	51.7	485	118	12400	738	1120	1.51	0.0821	0.306	40.2
	3_25		22.2	0.5	11.9	0.3	79.9	4.0	-3.9	1540											0.245	46.9	1.31	0.305	0.000515	904	0.112	17.3	0.0428	0.847	0.906	0.277	6.88	3.06	41.5	21.4	132	41.1	491	162	20300	328	2510	7.64	0.0352	0.340	24.6
Chillahuita	1_1	Rim	5.26	0.12	3.63	0.09	112	8	-8	4110	300	19	0.832	0.018	-0.0377	-0.0118	1.9900	696	7.53	-0.475
		Core									6540	591	0.445	0.030	-0.123	0.557	0.111	513	7.67	49.0
	1_2		4.32	0.07	4.01	0.10	267	51	-34	478
	1_3	Rim	4.76	0.06	4.39	0.14	263	60	-38	472	23300	1570	0.243	0.054	0.0467	0.296	0.026	697	7.95	74.9
		Core									10500	509	0.144	0.026	0.0247	0.611	0.035	739	8.06	87.5
	1_4		10.8	0.7	7.52	0.35	122	22	-18	1010
	1_5		8.26	0.23	5.46	0.15	108	8	-8	1320
	1_6		4.66	0.05	4.30	0.11	263	43	-31	515
	1_7		5.52	0.08	6.01	0.24	¥	¥	¥	173
	1_8		5.01	0.11	3.19	0.06	93.7	5.4	-5.2	973
	1_9	Rim	5.97	0.19	4.99	0.18	184	31	-24	471	19900	1350	0.332	0.041	-0.236	0.296	0.030	647	7.94	63.5
		Core									10300	505	0.136	0.017	-0.191	0.636	0.034	701	8.04	88.5
	1_10	Rim	4.31	0.05	3.82	0.08	217	22	-18	729	8870	428	0.103	0.013	-0.0122	0.766	0.037	688	8.21	92.7
		Core									5220	223	0.0776	0.0089	-0.0368	1.27	0.05	720	8.14	96.0
	1_11		4.63	0.05	4.43	0.09	326	79	-45	672
	1_12		5.35	0.13	4.62	0.14	201	30	-23	394
	1_13		7.49	0.16	6.82	0.20	252	51	-35	299
	1_14		5.81	0.10	5.55	0.21	326	236	-69	212
	1_16		7.44	0.24	5.19	0.18	119	13	-11	1280
	1_17		5.51	0.07	4.70	0.08	193	15	-13	957
	1_18		5.91	0.11	5.63	0.20	320	177	-64	266
	1_19		9.61	0.54	6.94	0.31	131	22	-18	1690
	1_20		4.58	0.06	4.08	0.13	224	36	-27	330
	1_21	Rim	5.98	0.06	4.25	0.10	122	7	-7	706
		Core
	2_1		7.07	0.16	4.32	0.10	91.1	5.4	-5.2	1670											1.44	125	4.13	0.673	0.000623	2540	0.510	72.2	0.383	5.75	7.42	1.79	34.3	13.2	153	67.4	339	87.4	905	232	13800	1990	4730	2.38	0.0799	0.344	36.0
	2_2	Rim	6.20	0.09	6.38	0.18	¥	¥	¥	407	5100	240	0.160	0.021	-0.128	1.17	0.07	845	8.07	85.4	0.274	169	3.26	0.293	0.000554	846	0.0517	28.8	0.0599	0.995	2.33	0.442	14.2	5.64	67.1	26.0	122	26.6	242	59.1	14100	511	1020	1.99	0.119	0.236	35.4
		Core									5830	233	0.124	0.018	0.163	1.08	0.05	1110	8.38	90.1	2.17	233	8.73	1.08	0.000561	1290	0.221	30.9	0.222	3.26	4.75	0.880	21.6	8.29	96.7	38.7	179	41.8	388	94.6	11400	415	623	1.50	0.0796	0.266	43.6
	2_3		4.82	0.06	4.65	0.14	346	225	-69	386											0.577	126	4.41	0.292	0.000574	1340	0.0770	39.2	0.173	3.45	6.08	1.58	27.4	9.58	108	41.9	188	43.0	405	96.7	12900	562	910	1.62	0.0967	0.376	38.7
	2_4		5.08	0.09	3.09	0.06	86.0	4.4	-4.2	1780
	2_5		6.51	0.54	4.85	0.23	136	34	-26	645
	2_6		6.14	0.07	5.53	0.15	239	33	-25	517											0.0512	122	8.31	0.396	0.000763	733	0.104	27.0	0.0974	1.83	1.85	0.467	10.2	4.16	51.2	22.4	110	27.3	272	71.1	14300	354	819	2.31	0.0993	0.329	34.8
	2_7		4.97	0.09	3.00	0.08	83.8	5.6	-5.3	931
	2_8		10.3	0.2	6.68	0.25	107	9	-8	646											0.170	95.6	2.26	0.309	0.000564	710	0.209	24.2	0.121	1.27	1.41	0.282	8.75	3.85	46.9	20.0	98.4	25.1	250	69.0	16800	231	757	3.28	0.0972	0.246	29.6
	2_9		4.36	0.07	3.76	0.07	198	18	-16	1330
	2_10		7.80	0.24	6.21	0.28	164	26	-21	812											0.0604	110	4.03	0.274	0.000539	970	0.0506	28.0	0.0771	1.66	3.72	0.954	17.0	6.37	70.0	28.4	131	30.7	307	77.6	13600	375	789	2.11	0.0910	0.368	36.5
	2_12		9.30	0.83	5.64	0.53	93.1	23.6	-19.4	1130											3.30	1480	2.32	5.89	0.000588	1950	9.73	60.4	2.81	13.0	5.57	1.37	25.5	9.75	122	54.6	290	78.2	841	233	16100	1030	4080	3.97	0.0718	0.352	30.9
	2_13		4.98	0.08	3.02	0.06	84.7	4.0	-3.8	962											2.89	104	4.32	1.17	0.000609	1430	0.272	49.1	0.257	12.3	5.35	1.45	26.8	9.79	113	43.9	207	48.8	458	113	13400	682	1340	1.97	0.107	0.372	37.2
	2_14		7.72	0.23	5.15	0.12	110	8	-8	1540											0.0644	163	4.17	0.267	0.000562	1400	0.0586	36.5	0.170	5.57	5.32	1.05	24.1	9.28	106	42.9	196	46.2	434	106	12900	615	1070	1.75	0.0842	0.284	38.6
	2_16		5.37	0.17	4.09	0.12	141	16	-14	518											0.146	165	4.66	0.299	0.000563	1210	0.0591	28.0	0.126	2.15	4.47	0.766	21.6	8.30	95.8	36.7	164	36.3	324	75.9	14000	336	589	1.75	0.0864	0.239	35.6
	2_17		6.15	0.08	3.68	0.06	86.3	3.5	-3.4	958											0.0354	182	2.79	0.266	0.000582	1300	0.0776	44.0	0.154	5.63	4.06	1.19	19.3	7.11	85.3	36.5	182	45.8	474	123	12600	758	1970	2.60	0.0930	0.412	39.5
	2_18		5.83	0.09	3.40	0.07	81.1	4.0	-3.9	853											0.118	50.6	1.93	0.282	0.000585	808	0.0942	19.4	0.0562	5.36	1.88	0.514	8.92	3.89	48.2	22.5	116	31.2	337	93.5	15700	322	1210	3.74	0.0575	0.385	31.7
	2_19		5.84	0.07	5.64	0.15	351	174	-64	360											0.119	97.7	3.16	0.291	0.000510	682	0.0846	18.2	0.0453	0.879	2.22	0.297	11.3	4.56	53.3	21.1	94.6	21.0	192	45.0	13800	186	498	2.68	0.0949	0.182	36.0
	2_20		7.38	0.18	4.54	0.11	93.0	6.0	-5.7	2270											1.27	48.7	14.9	0.522	0.00101	676	0.683	35.7	0.668	71.5	1.92	0.467	4.15	3.23	44.8	20.4	106	28.2	299	80.1	9210	371	1260	3.39	0.119	0.507	54.0
	2_21																				0.318	223	3.98	0.231	0.000601	895	0.0397	33.1	0.0806	1.56	2.13	0.640	11.7	4.56	52.3	21.3	93.8	22.0	186	44.5	12100	103	136	1.32	0.178	0.392	41.0
	2_22		6.56	0.29	5.49	0.24	186	41	-30	1730											0.261	124	3.96	0.281	0.000535	1200	0.0805	39.3	0.143	2.39	3.91	0.829	18.9	7.52	87.6	35.4	168	40.5	390	96.6	13500	530	1060	2.00	0.101	0.296	36.9
	2_23		5.03	0.11	5.07	0.16	¥	¥	¥	342											2.31	722	5.04	3.27	0.000615	930	5.84	35.3	1.54	7.44	4.07	0.729	17.4	6.68	77.2	30.3	136	30.6	274	64.2	12600	277	475	1.72	0.129	0.265	39.4
	2_23b	Rim									16200	1350	0.411	0.074	0.112	0.302	0.050	941	8.08	53.3	0.351	172	4.81	0.239	0.000498	1050	0.0289	46.8	0.0706	1.01	2.34	0.568	13.4	5.72	70.1	31.0	154	37.4	362	93.7	12600	625	1060	1.70	0.129	0.311	39.4
		Core									13100	633	0.248	0.050	0.122	0.443	0.038	1290	8.40	74.2	0.206	170	3.90	0.325	0.000514	2520	0.0924	78.4	0.349	5.31	8.16	1.79	39.3	14.8	175	72.8	354	84.7	808	198	13300	1470	2110	1.44	0.0971	0.306	37.4
	2_24		5.53	0.12	3.52	0.10	95.5	6.9	-6.5	1370											0.0895	114	2.67	0.270	0.000544	2290	0.0622	49.5	0.201	4.35	6.04	1.58	30.1	11.8	141	61.1	317	82.1	856	224	14600	990	3690	3.73	0.0578	0.359	34.1
	2_25		4.31	0.12	3.99	0.13	264	79	-45	830
	2_26		4.67	0.09	4.23	0.11	239	41	-30	439											0.379	156	6.54	0.312	0.000572	488	0.0542	19.3	0.0301	0.636	0.999	0.203	6.68	2.90	34.0	15.1	71.6	16.0	152	36.5	13600	91.6	251	2.74	0.127	0.240	36.6
	2_27	Rim	6.07	0.11	5.90	0.16	382	¥	-84	296	3360	121	0.125	0.015	0.120	1.81	0.08	736	8.22	90.0	2.73	244	4.20	0.777	0.000519	781	1.20	35.3	0.416	2.39	2.43	0.469	10.9	4.56	53.4	23.5	114	27.5	265	68.1	13000	428	876	2.05	0.133	0.280	38.4
		Core									2650	82	0.448	0.024	-0.166	1.26	0.12	1080	8.20	48.6	0.315	272	6.10	0.318	0.000529	1990	0.0718	35.8	0.226	4.45	8.70	1.05	38.7	14.7	166	64.5	270	57.2	471	106	11800	514	818	1.59	0.0759	0.176	42.0
	2b_1		6.42	0.15	4.10	0.12	98.1	7.2	-6.8	1420											117	50800	6.11	257	0.00104	1120	336	756	82.3	325	57.2	7.24	62.7	10.3	97.5	33.4	158	38.1	387	98.5	12500	557	1250	2.24	1.96	0.371	39.8
	3_1		4.42	0.10	4.37	0.14	460	¥	-162	981
	3_2		8.33	0.16	4.81	0.15	80.0	5.5	-5.3	505
	3_3		4.34	0.08	4.20	0.11	348	302	-72	2310
	3_4		6.93	0.41	4.34	0.32	90.6	17.8	-15.3	1030
	3_5		4.51	0.06	4.17	0.11	255	49	-34	1070
	3_6		4.58	0.06	4.21	0.10	249	40	-29	817
	3_7		4.59	0.06	4.23	0.09	250	38	-28	1060
	3_8		4.77	0.07	4.29	0.10	224	32	-25	1010
	3_9		4.81	0.08	4.58	0.09	306	78	-45	1270
	3_10		4.31	0.06	4.02	0.13	267	74	-44	462
	3_11		4.48	0.07	3.98	0.11	212	32	-25	610
	3_12		4.73	0.10	3.00	0.07	84.3	5.9	-5.6	598
Tocopuri	1_1	Rim	4.30	0.06	4.15	0.13	348	¥	-72	428	5860	618	0.400	0.081	0.514	0.689	0.148	486	7.35	54.7	0.193	207	5.68	0.254	0.000551	902	0.0335	26.9	0.113	1.58	2.98	0.507	15.3	5.88	67.9	27.5	128	29.4	272	67.1	12400	311	587	1.89	0.0990	0.230	40.3
		Core									6510	415	0.285	0.038	0.00411	0.768	0.081	453	8.25	69.4	0.114	199	5.94	0.275	0.000567	1510	0.0632	32.9	0.247	4.23	7.38	1.20	32.8	11.7	127	47.8	204	44.3	385	89.8	12100	566	719	1.27	0.0856	0.235	41.2
	1_2		4.28	0.05	2.98	0.07	110	7	-7	678
	1_3		3.65	0.04	2.62	0.05	115	6	-6	969
	1_4		4.40	0.06	4.09	0.10	272	49	-34	615
	1_5		4.14	0.07	3.48	0.13	179	26	-21	653
	1_6	Rim	5.45	0.20	5.28	0.23	364	¥	-111	451	4190	211	0.156	0.020	0.319	1.42	0.08	1490	7.24	85.9	0.159	314	7.33	0.290	0.000464	1440	0.0716	9.49	0.214	3.60	6.29	0.905	33.3	12.8	134	48.4	187	35.9	273	57.5	12300	194	603	3.10	0.0347	0.192	40.5
		Core									4190	159	0.214	0.039	-0.137	1.31	0.10	718	8.54	78.6	0.293	524	11.0	0.282	0.000604	1620	0.0952	10.3	0.174	3.62	7.07	0.822	34.8	13.1	143	52.1	212	41.9	324	71.1	10800	217	634	2.92	0.0318	0.161	46.2
	1_7		4.83	0.07	4.62	0.16	328	192	-66	440
	1_8		4.00	0.05	3.00	0.08	130	10	-9	714
	1_9		4.64	0.07	4.01	0.12	201	26	-21	490
	1_10		8.24	0.34	6.05	0.22	135	17	-15	3440
	1_11	Rim	6.18	0.09	5.97	0.25	360	¥	-91	303	6060	434	0.308	0.064	-0.336	0.799	0.123	434	7.62	66.5	0.176	140	3.93	0.253	0.000583	516	0.0474	18.2	0.0406	0.578	1.29	0.279	7.04	2.81	35.6	15.3	78.3	19.0	189	49.8	12900	202	495	2.45	0.0964	0.284	38.7
		Core									4890	223	0.127	0.020	-0.0404	1.27	0.07	597	8.22	89.6	0.312	211	5.14	0.277	0.000514	1680	0.108	35.3	0.337	5.10	8.08	1.46	34.0	12.3	142	55.5	259	59.1	543	135	12500	896	1250	1.40	0.0650	0.271	39.8
	1_12		3.92	0.05	3.44	0.10	208	28	-22	529
	1_13		3.84	0.04	3.16	0.08	166	15	-13	658
	1_14		4.07	0.05	2.87	0.06	112	6	-6	1040
	1_15		6.05	0.09	5.23	0.16	204	26	-21	368
	1_16	Rim	5.78	0.09	5.80	0.19	¥	¥	¥	295	4810	284	0.246	0.045	-0.00319	1.10	0.11	638	7.45	74.5
		Core																			0.181	432	3.90	0.222	0.000513	1640	0.0699	7.56	0.0534	1.29	3.85	0.287	28.0	12.1	144	53.9	226	46.2	377	80.4	13900	184	680	3.69	0.0201	0.0847	35.9
	1_17		3.99	0.04	2.81	0.06	111	6	-6	913
	1_18		4.51	0.08	3.95	0.12	209	31	-24	469
	1_19		4.28	0.06	3.09	0.09	119	9	-9	486
	1_20	Rim	6.89	0.18	6.80	0.25	471	¥	-169	321	3410	216	0.248	0.041	0.310	1.50	0.15	447	7.45	74.2	0.280	116	2.69	0.255	0.000522	492	0.0321	16.2	0.0224	0.468	0.922	0.185	5.73	2.56	32.9	14.2	72.9	18.9	189	50.3	14400	181	586	3.25	0.0856	0.247	34.6
		Core									2910	147	0.199	0.032	0.311	1.87	0.14	252	8.49	80.5	0.202	207	6.31	0.281	0.000489	941	0.0516	19.4	0.0880	1.52	3.33	0.494	18.1	7.12	79.7	29.9	128	26.9	235	53.6	12400	172	300	1.75	0.0826	0.195	40.2
	2_1		4.49	0.05	3.40	0.10	135	11	-10	647											5.45	1890	3.66	13.6	0.000600	1370	20.6	81.8	4.91	19.6	6.80	1.11	24.4	8.95	101	41.8	197	46.7	436	104	13400	619	1010	1.63	0.188	0.264	37.1
	2_2		4.10	0.06	3.04	0.07	127	9	-8	746											32.1	262	20.2	2.56	0.000740	2060	0.177	52.2	0.342	6.06	8.70	1.70	39.9	15.3	173	66.3	288	62.6	556	132	12400	860	1160	#VALUE!	#VALUE!	0.279	#VALUE!
	2_3																				5.75	117	4.91	0.242	0.000504	365	0.0818	15.5	0.0567	1.37	0.978	0.272	4.90	1.98	25.3	11.2	55.6	13.4	140	35.2	13700	109	282	#VALUE!	#VALUE!	0.381	#VALUE!
	2_4		4.88	0.08	3.34	0.09	109	8	-7	892											0.779	121	2.78	0.274	0.000649	1070	0.270	42.1	0.537	73.7	4.07	0.761	13.5	6.43	82.1	32.8	147	33.8	325	74.1	9550	421	875	2.08	0.130	0.314	52.1
	2_5	Rim	6.35	0.07	6.35	0.19	810	¥	-451	332	7660	791	0.269	0.083	0.722	0.696	0.111	682	7.51	71.5	0.382	255	3.51	0.891	0.000533	803	0.779	29.5	0.221	1.38	2.15	0.371	11.2	4.66	56.9	24.3	119	28.4	275	70.9	12900	343	841	2.45	0.107	0.231	38.6
		Core									9350	521	0.257	0.045	0.494	0.583	0.051	618	8.55	73.0	0.205	363	9.19	0.220	0.000509	2390	0.0690	43.8	0.233	3.96	9.60	1.20	47.8	18.6	206	78.2	324	66.5	538	118	12600	383	523	1.36	0.0813	0.171	39.5
	2_6		5.30	0.10	4.25	0.18	162	22	-19	358											0.419	195	3.51	0.257	0.000558	1070	0.0596	36.0	0.0984	4.51	3.01	0.642	16.3	6.87	77.9	32.1	148	33.7	319	75.4	12600	323	660	2.05	0.113	0.281	39.4
	2_7		4.31	0.09	2.92	0.08	104	8	-7	1480											0.374	139	2.53	0.272	0.000562	1980	0.0942	55.1	0.187	3.72	6.71	1.36	33.3	12.6	144	59.4	277	66.1	626	153	13700	966	1540	1.60	0.0881	0.280	36.4
	2_8		3.86	0.07	3.10	0.12	154	20	-17	661											0.729	183	4.07	0.865	0.000574	1850	0.587	92.3	0.508	9.87	8.75	1.50	37.2	13.3	151	59.1	269	62.4	591	137	12100	1400	1800	1.29	0.156	0.254	41.0
	2_9		3.96	0.11	2.86	0.12	118	15	-13	785											0.523	169	3.26	0.363	0.000572	1780	0.110	55.4	0.234	4.44	6.99	1.53	31.3	11.8	137	55.6	249	57.1	514	123	13900	760	1120	1.47	0.108	0.318	35.8
	2_10		4.48	0.07	4.03	0.13	232	42	-30	325											0.175	141	4.57	0.311	0.000564	1140	0.101	28.7	0.168	4.58	4.35	1.03	19.7	7.37	84.8	34.2	159	38.3	369	90.5	12900	492	766	1.56	0.0777	0.342	38.7
	2_12		4.55	0.10	4.22	0.17	270	99	-51	314											1.37	553	4.55	3.11	0.000566	1060	2.75	37.2	0.468	2.37	3.47	0.754	15.9	6.13	71.8	30.1	142	32.0	307	76.2	13200	352	569	1.62	0.121	0.311	37.6
	2_13		4.25	0.06	3.61	0.08	187	17	-15	543											0.382	215	4.15	0.317	0.000559	1120	0.0686	27.3	0.102	2.09	3.55	0.886	20.9	8.32	92.3	33.5	144	33.0	314	77.4	13200	383	609	1.59	0.0871	0.316	37.8
	2_14		5.28	0.13	4.84	0.18	255	72	-43	368											0.472	107	3.27	0.383	0.000524	437	0.436	22.7	0.116	0.743	0.884	0.255	5.47	2.28	30.6	13.7	68.6	17.5	179	46.5	14200	193	468	2.43	0.127	0.356	35.0
	2_15		3.84	0.05	2.65	0.05	105	6	-6	762
	2_16		4.67	0.08	4.42	0.10	301	74	-44	427
	2_17		7.96	0.57	7.36	0.52	272	¥	-88	492											0.127	127	3.89	0.320	0.000552	1010	0.0653	24.1	0.0945	1.93	3.15	0.635	17.3	6.54	76.1	30.2	137	31.3	298	73.5	14200	326	656	2.02	0.0810	0.263	35.1
	2_18		4.50	0.05	3.69	0.07	168	11	-10	763											0.366	158	4.41	0.278	0.000520	1150	0.0578	35.0	0.141	2.33	4.37	0.927	20.6	7.66	89.7	36.3	166	38.2	363	89.5	13500	481	830	1.73	0.0965	0.299	36.9
	2_19	Rim	4.60	0.11	4.70	0.18	¥	¥	¥	297	5670	305	0.202	0.031	-0.135	0.999	0.077	822	7.40	80.1	0.900	323	5.92	0.794	0.000514	1100	0.888	35.2	0.301	2.25	3.25	0.605	15.4	6.49	77.0	32.6	155	37.1	351	87.6	11800	402	765	1.90	0.100	0.262	42.1
		Core									5470	172	0.0877	0.0130	0.105	1.17	0.04	1370	8.28	94.7	0.512	335	5.89	0.293	0.000543	3540	0.205	108	1.65	25.1	33.2	6.07	114	35.5	334	112	428	87.4	720	154	10900	2090	1560	0.749	0.150	0.303	45.6
	2_20	Rim	4.96	0.09	5.07	0.12	¥	¥	¥	376	7300	437	0.246	0.034	0.122	0.745	0.064	787	7.66	74.5	2.47	145	5.62	0.949	0.000592	589	0.230	20.2	0.0686	0.862	1.69	0.349	8.23	3.38	40.1	17.6	87.4	21.7	214	55.5	12500	232	535	2.30	0.0944	0.287	39.8
		Core									1870	162	0.714	0.046	-0.0595	0.597	0.450	469	8.29	14.7	0.411	170	4.43	0.491	0.000548	1220	0.198	25.3	0.147	2.43	4.02	0.666	19.7	7.96	93.9	38.3	179	41.0	387	96.0	12800	523	860	1.65	0.0654	0.229	39.0
	2_21	Rim	5.46	0.15	5.45	0.22	686	¥	-373	446	13000	1100	0.454	0.051	-0.237	0.327	0.061	830	7.29	47.9
		Core																			0.256	251	6.57	0.284	0.000611	1590	0.112	33.3	0.451	5.94	7.93	1.98	32.9	11.4	123	47.2	209	47.3	430	105	11100	626	753	1.20	0.0775	0.376	45.0
	2_22	Rim	4.97	0.09	5.00	0.10	¥	¥	¥	947	9020	404	0.229	0.032	-0.0964	0.640	0.044	1320	8.11	76.6	0.145	57.6	2.05	0.291	0.000518	340	0.0266	12.9	0.0160	0.235	0.432	0.160	2.76	1.19	17.0	8.90	52.4	15.4	179	54.4	15800	216	919	4.25	0.0718	0.450	31.4
		Core									6070	213	0.122	0.019	-0.00280	1.05	0.05	1070	8.33	90.3	0.222	154	2.91	0.322	0.000540	2050	0.0695	29.1	0.0842	2.16	6.68	0.914	38.7	15.4	170	65.1	279	61.6	532	121	14100	775	1660	2.14	0.0547	0.174	35.3
	2_23		4.13	0.06	3.17	0.07	138	9	-9	761
	2_24		4.05	0.05	2.77	0.06	105	6	-6	621											0.495	106	3.55	0.289	0.000566	940	0.0885	37.0	0.0933	3.17	3.45	0.667	16.6	6.15	72.5	29.1	132	31.2	288	70.9	12800	330	559	1.69	0.128	0.270	38.9
	2b_1		4.35	0.13	3.45	0.16	152	26	-21	411											2.72	1410	5.16	9.83	0.000451	2260	19.9	71.1	5.96	26.0	7.77	2.29	59.1	24.2	224	66.2	228	41.9	359	75.7	12500	275	469	1.70	0.198	0.328	39.9
	3_1		4.62	0.09	4.44	0.14	322	223	-68	1540
	3_2		3.94	0.04	2.66	0.06	91.1	5.7	-5.4	829
	3_3		4.13	0.05	3.96	0.14	319	243	-70	626
	3_4		4.33	0.11	3.24	0.16	122	19	-16	1560
	3_5		5.00	0.10	3.92	0.10	143	13	-12	1070
	3_6		4.35	0.15	3.89	0.21	216	82	-46	840
	3_7		5.19	0.10	3.48	0.09	97.9	7.4	-6.9	588
	3_8		5.60	0.08	3.51	0.09	85.8	5.4	-5.2	386
	3_9		4.45	0.07	3.81	0.11	184	23	-19	1150
	3_10		4.52	0.09	4.83	0.21	¥	¥	¥	861
Chascon	1_1		11.1	0.3	9.39	0.26	199	29	-23	1710
																					0.730	445	4.08	0.408	0.000564	3500	0.218	63.0	0.140	2.84	8.69	0.982	59.3	25.1	296	112	477	102	869	187	15400	2110	7170	3.40	0.0725	0.133	32.3
	1_2		13.9	0.3	12.6	0.3	249	44	-31	850
	1_3		12.3	0.4	12.2	0.4	733	¥	-407	1940	14100	354	0.107	0.011	0.0791	0.513	0.013	7410	8.36	92.2
	1_4		9.79	0.40	9.05	0.31	274	116	-55	809
	1_5		13.7	0.3	11.0	0.3	170	16	-14	1730
	1_6		11.3	0.5	9.26	0.30	182	32	-25	991
	1_7		14.5	0.6	12.0	0.4	187	32	-25	1280
	1_8		14.0	0.2	13.2	0.2	311	40	-29	1700
	1_9		6.86	0.19	6.54	0.17	324	172	-64	727
	1_10		11.6	0.1	10.5	0.2	255	25	-20	1130
	1_11		8.53	0.14	7.41	0.17	212	22	-19	1130
	1_12		7.87	0.58	7.69	0.51	399	¥	-179	784	14600	256	0.0903	0.0058	-0.0780	0.514	0.008	15700	8.97	94.3	0.579	348	3.96	0.908	0.000545	2410	1.16	77.5	0.449	3.74	6.60	0.718	36.4	14.5	169	68.2	320	74.5	704	168	15200	1910	6970	3.65	0.110	0.142	32.7
											4350	98	0.0704	0.0084	0.253	1.52	0.04	2670	8.58	96.9	0.511	470	3.03	1.46	0.000508	1180	2.66	62.0	0.931	5.62	4.97	1.06	20.9	7.70	86.3	34.6	159	37.8	359	94.6	12900	959	1970	2.05	0.173	0.318	38.6
	1_13		10.8	0.2	10.1	0.2	297	64	-40	1460
	1_14		12.1	0.5	10.5	0.4	211	46	-32	928
	1_15		12.3	0.2	11.9	0.2	362	79	-45	1460
	1_16		16.0	0.6	13.4	0.6	192	39	-29	1410
	1_17		4.56	0.07	4.09	0.15	230	48	-33	310
	1_18		9.74	0.18	8.44	0.13	212	19	-16	1360
	2_1		10.3	0.3	9.30	0.21	250	45	-32	1300
	2_2		12.5	0.4	8.84	0.31	128	13	-11	1310											0.108	174	2.57	0.219	0.000531	1080	0.165	48.7	0.120	1.83	3.82	0.808	17.6	6.83	78.7	32.8	160	39.0	414	112	13700	881	2460	2.80	0.118	0.302	36.4
	2_3		3.18	0.06	2.51	0.07	142	14	-12	570											8.40	328	14.9	6.02	0.000759	1480	0.556	73.7	0.298	3.68	5.67	1.80	28.0	10.5	117	45.4	202	44.5	399	91.8	10100	482	634	1.31	0.185	0.438	49.4
	2_4		10.3	0.1	9.43	0.24	262	42	-30	466											0.216	134	3.99	0.408	0.000529	1870	0.292	107	0.549	7.24	10.2	2.47	43.5	14.8	155	58.6	254	55.5	503	117	12100	1160	1700	1.47	0.213	0.359	41.0
	2_5		7.12	0.35	4.97	0.23	119	18	-15	470											0.303	253	4.30	0.296	0.000594	1360	0.0978	41.0	0.0842	1.36	3.30	0.735	19.3	8.02	95.7	41.6	199	48.6	493	130	12900	1090	3860	3.53	0.0832	0.283	38.5
	2_6		15.0	0.4	11.2	0.4	145	15	-13	863											0.113	37.6	1.59	0.286	0.000441	291	0.363	11.7	0.127	0.772	0.579	0.142	2.58	1.08	14.3	6.94	41.0	11.7	138	42.9	16500	126	803	6.35	0.0845	0.356	30.1
	2_7		8.93	0.17	6.29	0.23	124	12	-10	511											0.224	112	2.57	0.274	0.000573	517	0.116	22.9	0.0692	0.760	1.19	0.293	6.13	2.63	32.3	14.9	74.9	18.8	200	54.1	13200	231	913	3.95	0.115	0.332	37.8
	2_8		17.3	0.4	16.8	0.5	376	¥	-86	946
											14300	700	0.154	0.014	-0.148	0.482	0.024	2930	8.39	86.3
	2_9		10.7	0.3	9.13	0.24	204	26	-21	892	1780	45	0.102	0.006	-0.110	3.46	0.10	1810	8.61	92.9	0.0929	138	2.88	0.286	0.000499	753	0.0881	31.9	0.0489	0.758	2.05	0.544	10.4	4.15	49.6	21.7	110	28.2	293	80.5	13200	587	1770	3.02	0.109	0.361	37.8
	2_10		9.41	0.26	7.23	0.21	151	15	-13	2120
	2_12		5.62	0.27	4.73	0.20	186	44	-31	1770											0.129	246	3.88	0.288	0.000577	3680	0.230	150	0.703	11.4	17.8	3.72	82.2	28.6	309	117	484	104	907	202	11500	2030	2360	1.16	0.165	0.298	43.4
	2_13		6.17	0.19	4.61	0.12	137	13	-12	686											0.149	46.0	2.25	0.298	0.000524	306	0.0577	17.5	0.0537	1.01	1.64	0.379	7.27	2.36	23.4	8.42	38.6	9.06	89.1	24.8	14800	195	446	2.28	0.196	0.337	33.6
	2_14		8.43	0.44	7.04	0.33	187	47	-33	984											0.148	122	3.23	0.275	0.000587	1620	0.136	70.1	0.272	6.52	6.39	1.43	28.4	10.7	121	47.7	214	47.9	451	104	11400	939	1620	1.73	0.155	0.325	43.8
	2_15		8.73	0.11	8.44	0.13	363	96	-50	985											0.368	83.4	2.20	0.309	0.000519	640	0.262	23.1	0.141	3.59	1.72	0.367	7.52	3.04	37.5	16.7	84.7	21.4	238	68.7	12900	363	1340	3.69	0.0971	0.313	38.5
	2_16		8.37	0.23	8.29	0.22	496	¥	-172	787	15400	436	0.161	0.017	0.114	0.444	0.015	4340	8.40	85.3
																					0.282	276	6.80	0.381	0.000524	2000	0.427	105	0.640	8.54	13.5	2.54	55.2	18.2	182	62.7	247	50.2	406	89.0	11900	836	923	1.10	0.258	0.286	41.8
	2_17		5.64	0.18	5.50	0.20	390	¥	-118	625	20000	691	0.196	0.022	-0.337	0.358	0.015	4360	8.38	80.8
																					0.300	224	4.04	0.260	0.000559	1370	0.171	35.0	0.105	1.87	4.00	0.720	23.4	9.39	108	42.0	183	41.8	377	91.3	13800	495	1900	3.84	0.0928	0.228	36.0
	2_19		8.00	0.14	7.66	0.16	334	104	-52	1800
	2_20		6.57	0.30	5.77	0.33	218	81	-46	773
	2b_1		9.21	0.28	9.28	0.24	¥	¥	¥	1490	136	3	0.829	0.010	-0.0471	0.0321	1.7800	905	7.97	-0.0179	0.504	305	13.8	0.334	0.000594	2180	0.315	69.0	0.310	4.85	7.99	1.73	43.3	16.6	180	67.1	282	59.4	511	113	10900	1710	2720	1.59	0.135	0.284	45.5
											7130	702	0.456	0.064	0.0386	0.503	0.121	333	8.17	47.7	33.8	80.1	47.6	20.3	0.00129	328	1.90	13.3	0.388	2.52	2.26	0.662	10.1	3.19	29.7	10.5	41.3	9.12	71.8	17.8	9540	110	145	1.32	0.185	0.425	52.2
	3_1		14.0	0.6	12.6	0.5	248	89	-48	673
	3_2		10.7	0.4	6.95	0.25	104	11	-10	271
	3_4		10.5	0.2	8.68	0.26	179	21	-18	1200
	3_5		8.61	0.27	7.47	0.19	207	33	-25	1420
	3_6		9.65	0.57	10.6	0.7	¥	¥	¥	1570
	3_7		13.9	1.2	10.7	0.7	151	47	-33	2200
	3_9		13.2	0.5	10.5	0.4	166	26	-21	707
	3_10		10.6	0.4	9.26	0.27	212	39	-28	1560
	3_11		9.81	0.33	10.3	0.4	¥	¥	¥	1460
	3_12		6.87	0.33	6.39	0.25	273	181	-65	1790
	3_13		7.65	0.27	6.61	0.21	202	39	-29	171
	3_14		8.68	0.18	6.46	0.21	136	13	-11	581
	3_15		5.62	0.39	4.71	0.30	178	70	-42	995
	3_16		7.66	0.11	6.42	0.15	183	17	-15	856
	3_17		5.94	0.45	4.89	0.31	169	64	-40	1750
	3_18		8.18	0.30	6.24	0.20	143	18	-16	1300
	3_19		15.8	0.3	16.2	0.5	¥	¥	¥	816
AS3	1_1		4.04	0.03	4.03	0.08				1020
	1_2		4.69	0.04	5.06	0.14				2290
	1_3		4.71	0.11	4.91	0.19				621
	1_4		4.98	0.05	4.33	0.23				805
	1_6		7.07	0.17	7.05	0.42				230
	1_7		7.41	0.13	7.60	0.20				829
	1_8		3.80	0.09	4.04	0.23				1200
	1_9		5.24	0.04	5.29	0.20				362
	1_10		5.98	0.05	5.79	0.36				171
	2_1		5.75	0.06	5.65	0.17				348
	2_2		4.49	0.06	4.35	0.16				223
	2_3		6.85	0.10	6.73	0.29				157
	2_4		5.26	0.06	5.22	0.20				196
	2_5		4.66	0.06	4.58	0.19				191
	2_6		4.39	0.05	4.59	0.16				216
	2_7		4.99	0.06	5.44	0.24				236
	2_8		7.62	0.12	8.00	0.41				178
	2_9		6.77	0.11	7.37	0.36				182
	2_10		6.13	0.07	6.16	0.20				338
	2_11		4.06	0.04	4.05	0.12				408
	2_12		4.37	0.07	4.54	0.09				1330
	2_13		4.08	0.04	4.30	0.12				378
	2_14		4.82	0.05	4.78	0.11				637
	3_1		4.01	0.06	4.14	0.15				299
	3_2		4.39	0.05	4.57	0.13				369
	3_4		4.38	0.05	4.36	0.12				380
	3_5		3.90	0.04	3.94	0.11				362
	3_6		7.90	0.10	7.73	0.28				215
	3_1b		7.88	0.09	8.17	0.28				220
	3_2b		4.16	0.05	4.15	0.11				351
	3_3b		4.58	0.05	4.88	0.12				358
	3_4b		4.34	0.05	4.51	0.11				392
	3_5b		4.51	0.05	4.75	0.10				496
	3_6b		4.57	0.05	4.94	0.12				335
91500	1_1																				0.860	54.8	5.46	0.295	0.0000361	152	0.0294	2.96	0.0152	0.267	0.431	0.178	2.17	0.923	11.3	5.11	27.5	6.94	64.9	15.9	6220	30.4	96.9	0.314	33.6	0.461	80.0
	1_2																				0.914	38.9	4.31	0.313	0.0000384	160	0.0372	3.22	0.0193	0.286	0.507	0.244	2.08	0.943	12.2	5.37	27.7	7.22	69.9	16.4	6140	33.4	100	0.332	28.8	0.627	81.0
	1_3																				1.02	27.1	5.11	0.279	0.0000342	152	0.0237	3.05	0.0154	0.199	0.431	0.195	2.00	0.869	11.3	4.86	25.2	6.65	64.6	15.5	6090	32.1	104	0.310	37.4	0.539	81.7
	1_4																				0.781	27.1	5.22	0.261	0.0000319	148	0.0297	3.03	0.00777	0.136	0.486	0.199	2.26	0.843	11.3	5.19	25.2	7.01	65.6	15.3	6020	32.9	99.4	0.331	47.3	0.486	82.7
	1_5																				1.92	26.0	5.19	0.421	0.0000516	148	0.0214	2.80	0.0174	0.204	0.407	0.201	2.07	0.924	11.7	5.44	26.5	6.77	65.3	15.1	6000	32.1	104	0.309	33.0	0.546	83.0
¥ = secular equilibrium
decay constants used: λ230: 9.158·10-6 a-1; λ232: 4.9475·10-11 a-1; λ235: 9.8485·10-10 a-1; λ238: 1.55125·10-10 a-1
230Th/238U age for model melt composition (230Th)/(232Th) = 0.724 and (230Th)/(232Th) = 0.726 using values for Parinacota rhyolite PAR-91-014 (Bourdon et al., 2000); using alternative model melt compositions (e.g., Parinacota dacite) changes absolute ages on average by only 3 ka.
206Pb/238U age after 207Pb-correction, and disequilibrium correction (Th/U melt = 2.16)
204Pb/206Pb only reported for comparison
all values relative to NIST SRM 610 glass (Pearce et al., 1997) except for Ti which is calibrated relative to SL13 zircon (6.32 ppm Ti; Harrison and Schmitt, 2007)
57Fe+/30Si+ for guidance only; elevated Fe counts on unknown zircons relative to 91500 are used as indication for beam overlap onto non-zircon phases
